# Supplementary material for: Objective measurements of skinfold thickness with a caliper show a significant relationship to total body fat percentage in dogs
Source: Frontiers journal article supplement (doi:10.3389/fvets.2025.1656855), 2025-09-12
Supplement: Table_4.pdf [file Table_4.pdf]

#### Supplementary file 4; Descriptive statistics of the Chihuahua dogs.

Supplementary table 1. Descriptive statistics of the four Chihuahua dogs included in the cohort.

| BCS | BF%  | Objective skinfold thickness (mm) |             |             |
|-----|------|-----------------------------------|-------------|-------------|
|     |      | Dorsal neck                       | Axillar rib | Lumbar back |
| 2   | 6.4  | 2.7                               | 1.7         | 2.3         |
| 4   | 43.5 | 4.5                               | 3.1         | 3.5         |
| 6   | 62.3 | 6.8                               | 3.5         | 4.9         |
| 9   | 64.2 | 8.4                               | 4.8         | 6.8         |

BCS: Body condition score, BF%: Total body fat percentage, mm: millimeter. Four privately owned newly euthanized dogs were assessed for BCS by the 9-point BCS scale (Laflamme 1997), evaluated for BF% by Dual-Energy X-ray Absorptiometry (DEXA) and by objective measurements for skinfold thickness at the location of the dorsal neck, the axillar rib and the lumbar back by a caliper. Objective measurements of skinfold thickness are here shown as the mean of the triplicate for both observers in millimeter (mm).
